# Supplementary material for: Impacts of a porous hollow silica nanoparticle-encapsulated pesticide applied to soils on plant growth and soil microbial community
Source: Royal Society of Chemistry journal article supplement (doi:10.1039/d1en00975c), 2022-01-01
Supplement: d1en00975c1.pdf [file d1en00975c1.pdf]

*Supporting Information for:*

# Impacts of a Porous Hollow Silica Nanoparticle-Encapsulated Pesticide Applied to Soils on Plant Growth and Soil Microbial Community

Vinicius Bueno<sup>1</sup>, Peiying Wang<sup>2</sup>, Orfeo Harrisson<sup>1</sup>, Stéphane Bayen<sup>2</sup> and Subhasis Ghoshal<sup>1\*</sup>

<sup>1</sup>*Department of Civil Engineering, McGill University, Montreal, Quebec H3A 0C3, Canada*

<sup>2</sup>*Department of Food Science and Agricultural Chemistry, McGill University, Ste-Anne-de-Bellevue, Quebec H9X 3V9, Canada*

\*Corresponding author, e-mail: [subhasis.ghoshal@mcgill.ca](mailto:subhasis.ghoshal@mcgill.ca), Phone: (1)-514-398-6867; Fax: (1)-514-398-736

Number of pages: 10

Number of figures: 5

Number of tables: 3

**Table S1.** List of the soil properties.

| <b>Analysis</b>                                    | <b>Result</b> |
|----------------------------------------------------|---------------|
| pH                                                 | 7.0           |
| C <sub>om</sub> (%)                                | 4.1           |
| P (ppm)                                            | 152           |
| K (ppm)                                            | 357           |
| Mg (ppm)                                           | 291           |
| Al (ppm)                                           | 759           |
| Na (ppm)                                           | 14            |
| CEC (meq/100 g)                                    | 16.9          |
| Water Holding Capacity at 1/3 bar (%) <sup>a</sup> | 22.9          |
| Water Holding Capacity at 15 bars (%) <sup>a</sup> | 13.26         |
| Available Water Capacity (%) <sup>a</sup>          | 9.69          |
| Sand (%)                                           | 31            |
| Silt (%)                                           | 34            |
| Clay (%)                                           | 35            |

Note: C<sub>om</sub>: organic matter concentration, P: phosphate, K: potassium, Mg: magnesium, Al: aluminum, Na: sodium, CEC: cation exchange capacity, <sup>a</sup> USDA no. 42 method.

**Matrix Effects on the Azoxystrobin Detection.** To validate the azoxystrobin measurements from the biomass extract, recovery validation was determined by spiking control plant biomass after homogenization with azoxystrobin in different concentration ranges. The low-range and high-range concentration comprised in spiking azoxystrobin in homogenized biomass to a final concentration of 10 ppb and 500 ppb, respectively. The recoveries ( $N = 3$ ) for the low range (RL) and high range (RH) can be found in Table S2.

**Table S2.** Azoxystrobin recoveries in homogenized biomass for low- and high-range concentrations.

| Range | Sample ID | Recovery (%) | Average (%) | Standard Deviation (%) |
|-------|-----------|--------------|-------------|------------------------|
| Low   | RL1       | 102          | 105         | 2.5                    |
|       | RL2       | 108          |             |                        |
|       | RL3       | 106          |             |                        |
| High  | RH1       | 107          | 107         | 1.0                    |
|       | RH2       | 106          |             |                        |
|       | RH3       | 108          |             |                        |

**qPCR Thermal Cycling Parameters.** The thermal cycling protocol for bacteria was as follows: denaturation at 95°C for 3 minutes followed by 40 cycles of amplification (10 s at 95 °C, 30 s at 50 °C, 60 s at 72 °C). For fungi, the denaturation step took place at 95°C for 3 minutes followed by 40 cycles of amplification (20s at 95°C, 30s at 50°C, 90s at 72°C).

**Table S3.** List of suspected metabolites derived from azoxystrobin in tomato plants for different treatments and data points. The peaks were categorized by low, medium and high based on the comparison among them and do not have quantification purposes.

| Suspected metabolites of azoxystrobin in <i>Solanum lycopersicum</i> |                                                                                   |                                                                                    |                                                                                     |                                                                                     |                                                                                     |                                                                                     |        |
|----------------------------------------------------------------------|-----------------------------------------------------------------------------------|------------------------------------------------------------------------------------|-------------------------------------------------------------------------------------|-------------------------------------------------------------------------------------|-------------------------------------------------------------------------------------|-------------------------------------------------------------------------------------|--------|
| Structure                                                            | 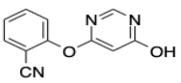 |  |  |  |  |  |        |
| Formula                                                              | C <sub>11</sub> H <sub>7</sub> N <sub>3</sub> O <sub>2</sub>                      | C <sub>21</sub> H <sub>15</sub> N <sub>3</sub> O <sub>5</sub>                      | C <sub>7</sub> H <sub>5</sub> NO                                                    | C <sub>20</sub> H <sub>13</sub> N <sub>3</sub> O <sub>5</sub>                       | C <sub>15</sub> H <sub>14</sub> N <sub>2</sub> O <sub>5</sub>                       | C <sub>20</sub> H <sub>15</sub> N <sub>3</sub> O <sub>5</sub>                       |        |
| Ion m/z ratio                                                        | 214.06166                                                                         | 390.10902                                                                          | 120.04494                                                                           | 376.09337                                                                           | 303.09813                                                                           | 378.10902                                                                           |        |
| Treatment                                                            | Replicate                                                                         | Peak Intensity                                                                     |                                                                                     |                                                                                     |                                                                                     |                                                                                     |        |
| Azo<br>[Day 10]                                                      | 1                                                                                 | Low                                                                                | Low                                                                                 | Not detected                                                                        | Not detected                                                                        | Low                                                                                 | Low    |
|                                                                      | 2                                                                                 | Low                                                                                | Low                                                                                 | Not detected                                                                        | Not detected                                                                        | Low                                                                                 | Low    |
|                                                                      | 3                                                                                 | Low                                                                                | Low                                                                                 | Not detected                                                                        | Not detected                                                                        | Low                                                                                 | Low    |
| Azo<br>[Day 20]                                                      | 1                                                                                 | Low                                                                                | Low                                                                                 | Not detected                                                                        | Low                                                                                 | Low                                                                                 | Low    |
|                                                                      | 2                                                                                 | Low                                                                                | Low                                                                                 | Not detected                                                                        | Low                                                                                 | Low                                                                                 | Low    |
|                                                                      | 3                                                                                 | Low                                                                                | Low                                                                                 | Not detected                                                                        | Low                                                                                 | Low                                                                                 | Low    |
| Azo@PHSN<br>[Day 10]                                                 | 1                                                                                 | Medium                                                                             | Medium                                                                              | Not detected                                                                        | Low                                                                                 | Low                                                                                 | Medium |
|                                                                      | 2                                                                                 | Medium                                                                             | Medium                                                                              | Not detected                                                                        | Low                                                                                 | Low                                                                                 | Medium |
|                                                                      | 3                                                                                 | Medium                                                                             | Medium                                                                              | Not detected                                                                        | Low                                                                                 | Low                                                                                 | Medium |
| Azo@PHSN<br>[Day 20]                                                 | 1                                                                                 | High                                                                               | High                                                                                | Low                                                                                 | High                                                                                | High                                                                                | High   |
|                                                                      | 2                                                                                 | High                                                                               | High                                                                                | Low                                                                                 | High                                                                                | High                                                                                | High   |
|                                                                      | 3                                                                                 | High                                                                               | High                                                                                | Low                                                                                 | High                                                                                | High                                                                                | High   |

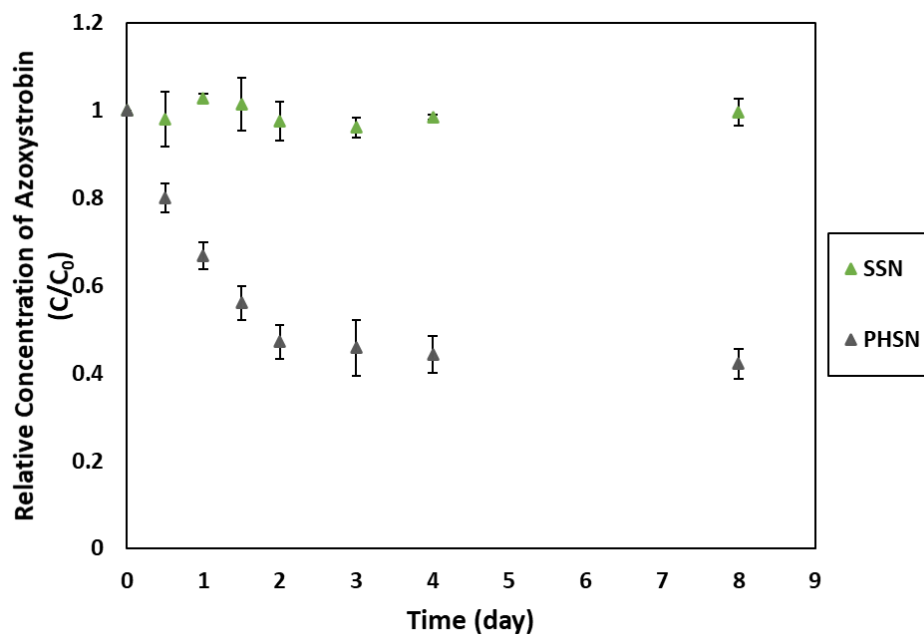

**Figure S1.** Relative concentration ( $C/C_0$ ) of azoxystrobin in solution (20% v/v methanol) phase over time using solid  $\text{SiO}_2$  NPs (SSN) and porous hollow  $\text{SiO}_2$  NPs (PHSN) as nanocarriers.

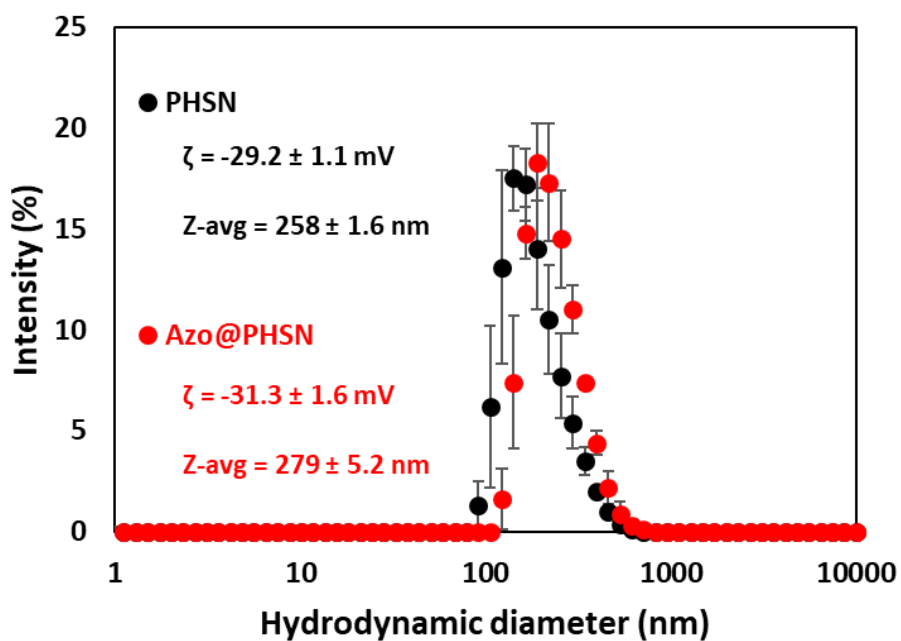

**Figure S2.** Hydrodynamic diameter distribution, zeta average and zeta potential of PHSN (●) and Azo@PHSN (●) measured at pH 6.5 and ionic strength 1 mM (NaCl).

**Pielou's evenness index ( $J'$ ) and Faith's Phylogenetic Diversity (PD).** The Pielou's evenness index ( $J'$ )<sup>1</sup> is the numerical representation that quantifies how equal the microbial communities are in the sample. In other words, it is the mathematical measurement of the biodiversity in the sample. At day 10, there was no significant statistical difference among the bacterial communities for all treatments, based on the  $J'$  (Figure S5a). The variance was analyzed through Kruskal-Wallis pairwise testing and no p-value was below the  $p < 0.05$  threshold. Similarly, at day 20 there was no significant statistical difference among the bacterial communities (Figure S5b). The p-values of the pairwise comparison between control and Azo treatments, and control and Azo@PHSN treatments had the lowest p-values overall, 0.15 and 0.20, respectively. Faith's phylogenetic diversity (PD) is another way to measure biodiversity mathematically<sup>2</sup>. It, however, revealed the same conclusions as for the  $J'$ : no statistical difference could be determined among the bacterial communities with different treatments at days 10 (Figure S5c) and 20 (Figure S5d).

For fungi communities, at 10 days, three pairwise Kruskal-Wallis combinations of the  $J'$  indicated significant statistical difference, (1) day zero and Azo treatments, (2) day zero and PHSN treatments, and (3) day zero and Azo@PHSN treatments (Figure S5e), indicating that except for the day zero and control, all other treatments showed significant differences in the biodiversity when compared to the initial stage. After 20 days, however, the variance analysis of the  $J'$  indicated that only two combinations were statistically different, day zero and Azo@PHSN treatments, and control and Azo@PHSN treatments (Figure S5f), suggesting that the soil microbial community biodiversity differences tended to diminish as the days progressed. Faith's PD showed a different trend from the  $J'$  at day 10, where there were statistical changes only between Azo treatment and other three treatments: control, PHSN and Azo@PHSN (Figure S5g). At day 20, Faith's PD variance analysis showed representative differences in biodiversity between Azo and Azo@PHSN treatments, control and Azo@PHSN treatments (Figure S5h).

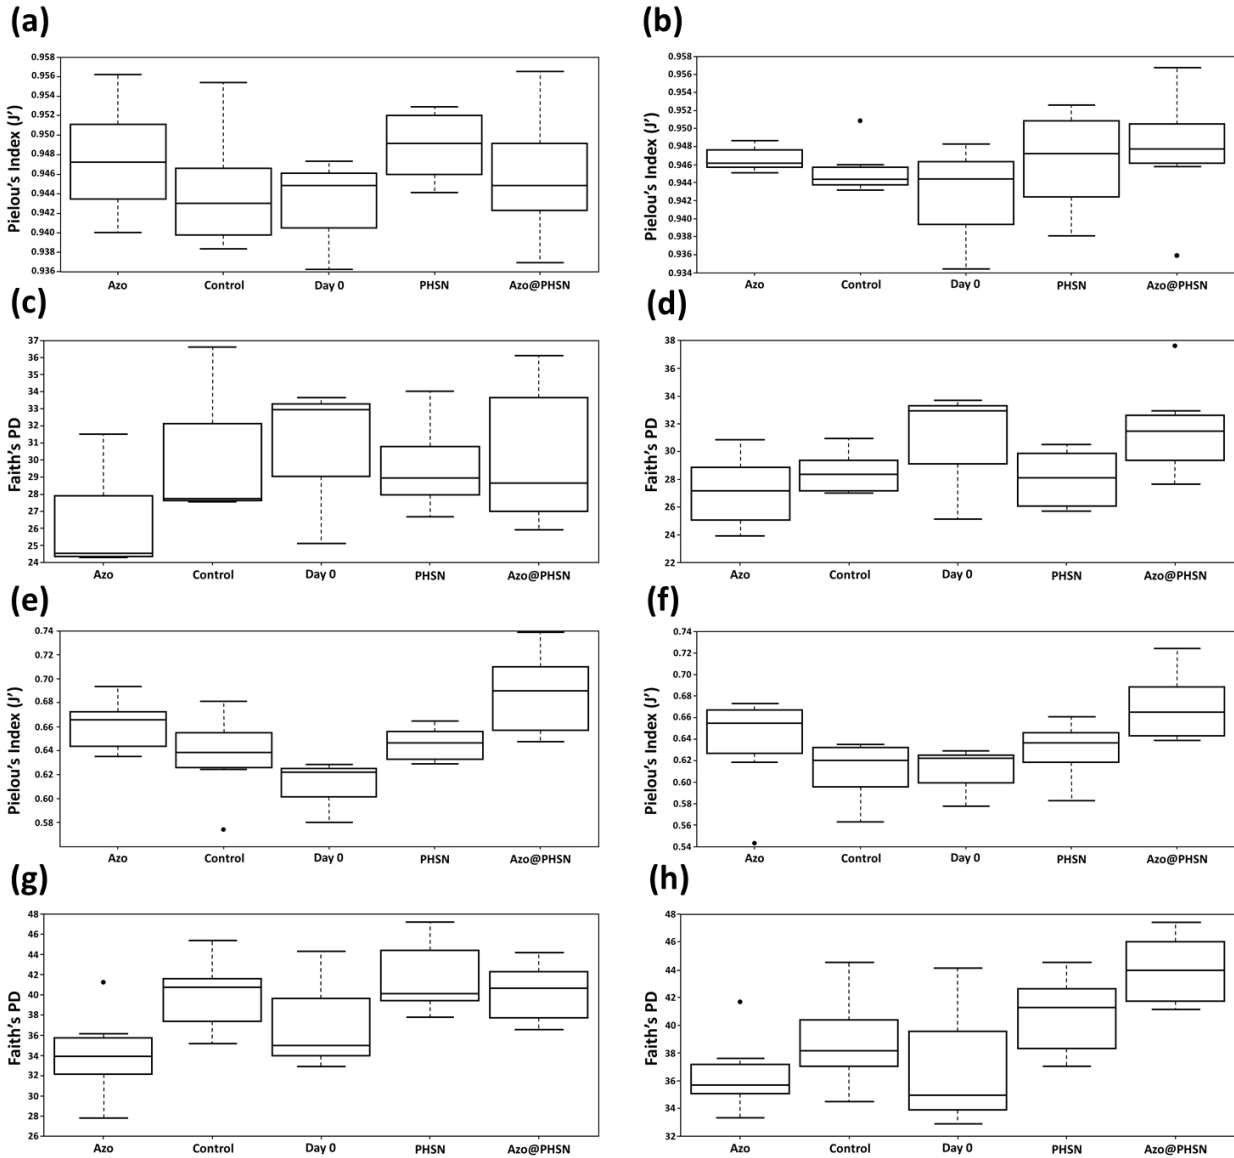

**Figure S3.**  $\alpha$ -diversity boxplots for the bacterial and archaea communities represented by (a) Pielou's evenness index for samples at day 10, (b) Pielou's evenness index for samples at day 20, (c) Faith's PD for samples at day 10, and (d) Faith's PD for samples at day 20.  $\alpha$ -diversity boxplots for the fungi communities represented by (e) Pielou's evenness index for samples at day 10, (f) Pielou's evenness index for samples at day 20, (g) Faith's PD for samples at day 10, and (h) Faith's PD for samples at day 20. The black dots above and below the error bars in some instances indicate outliers.

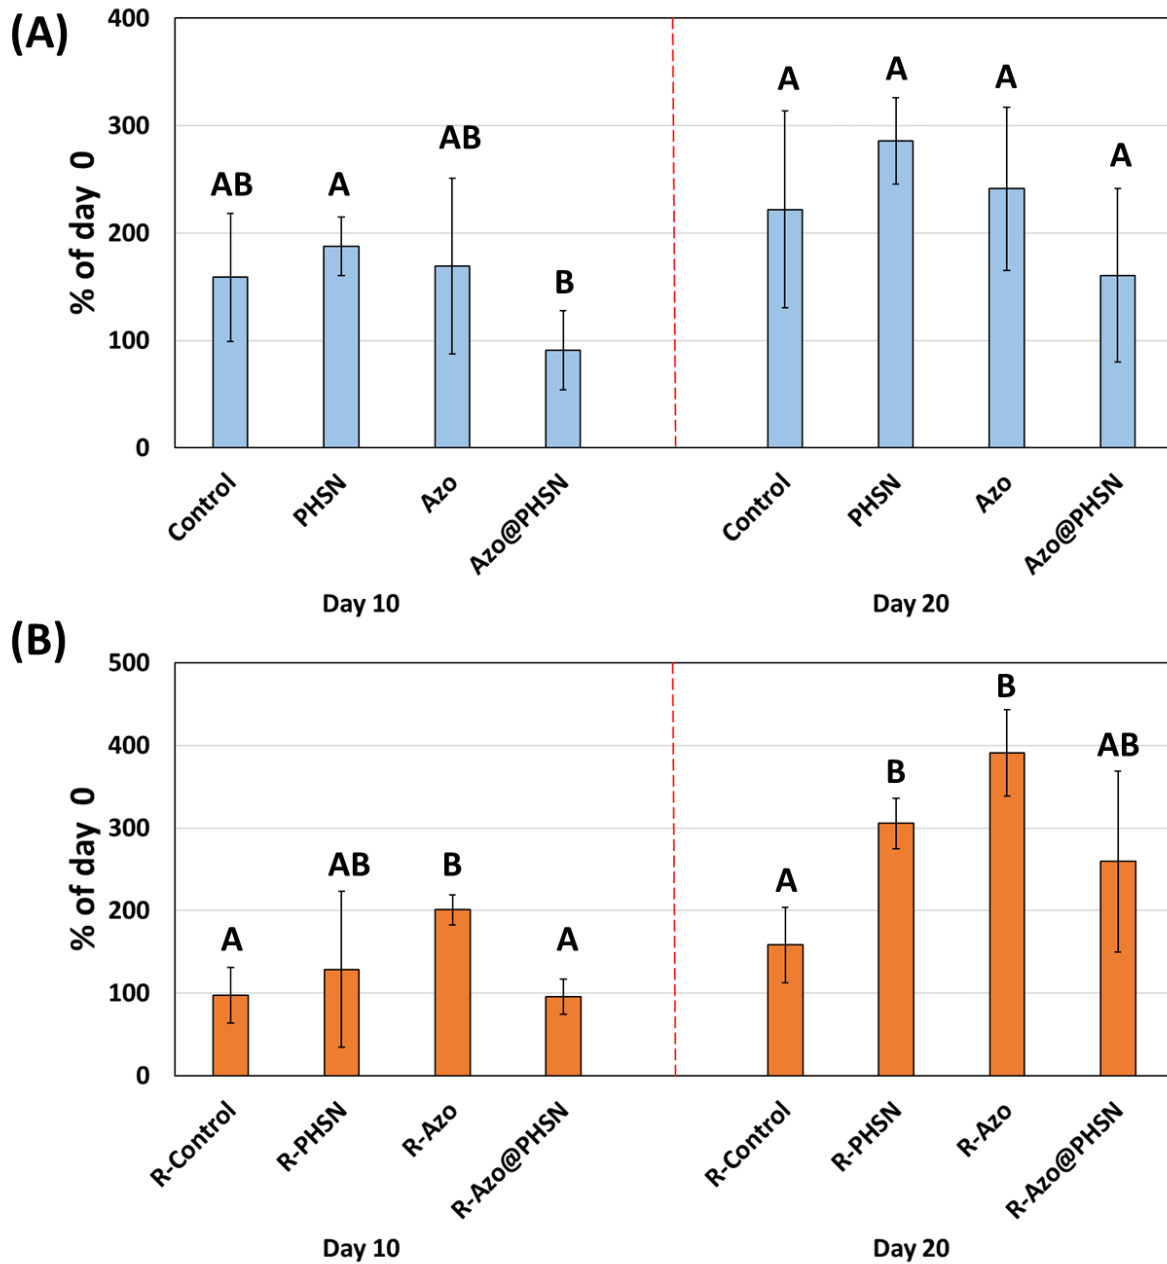

**Figure S4.** Percentage of day 0 soil microbial population in different treatments using qPCR targeting the gene 16S rRNA for total bacterial communities using (A) bulk soil and (B) soil loosely attached to the roots. Different letters (*A* and *B*) indicate significant statistical differences among samples (ANOVA one-way test,  $p < 0.05$  threshold).



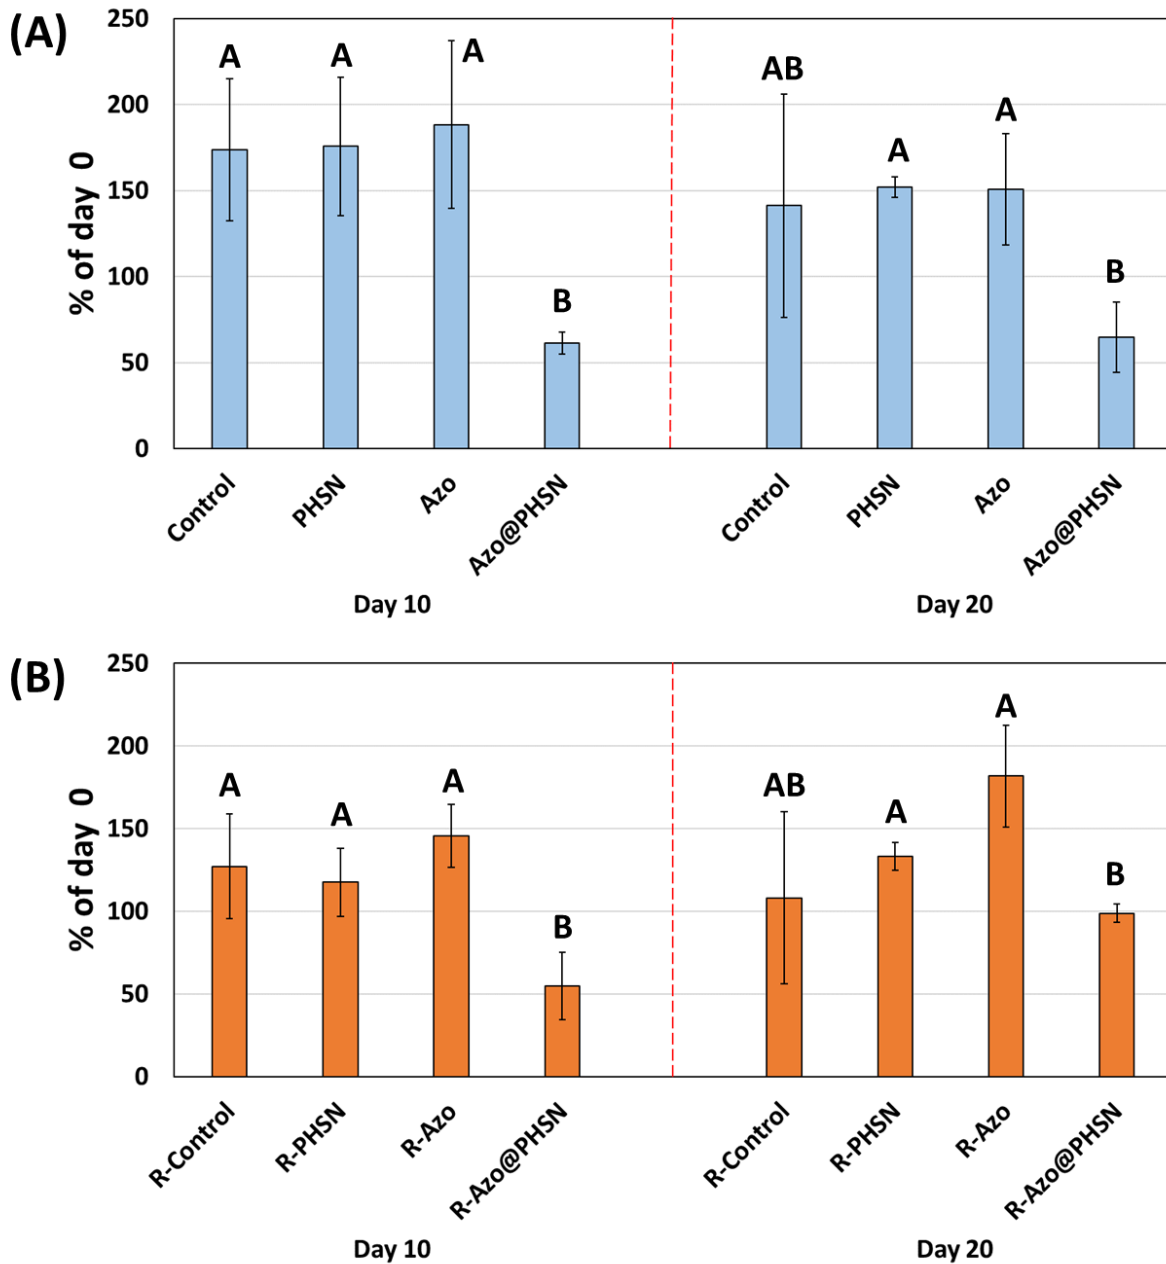

**Figure S5.** Percentage of day 0 soil microbial population in different treatments using qPCR targeting the gene 18S rRNA for total fungi communities using (A) bulk soil and (B) soil loosely attached to the roots. Different letters (*A* and *B*) indicate significant statistical differences among samples (ANOVA one-way test,  $p < 0.05$  threshold).

## REFERENCES

1. E. C. Pielou, The measurement of diversity in different types of biological collections, *Journal of theoretical biology*, 1966, **13**, 131-144.
2. D. P. Faith, Conservation evaluation and phylogenetic diversity, *Biological conservation*, 1992, **61**, 1-10.
